# Supplementary material for: Comparison of dimension reduction techniques in the analysis of mass spectrometry data
Source: Copernicus journal article supplement (doi:10.5194/amt-2019-404), 2019-11-15
Supplement: Supplementary file 1 [file amt-2019-404-supplement.pdf]

Supplementary Information for the manuscript “*Comparison of dimension reduction techniques in the analysis of mass spectrometry data*”

Sini Isokääntä<sup>1</sup>, Eetu Kari<sup>1</sup>, Angela Buchholz<sup>1</sup>, Liqing Hao<sup>1</sup>, Siegfried Schobesberger<sup>1</sup>, Annele Virtanen<sup>1</sup>, Santtu Mikkonen<sup>1</sup>

<sup>1</sup>Department of Applied Physics, University of Eastern Finland, Kuopio, 70210, Finland

Correspondence to: S. Isokääntä ([sini.isokaanta@uef.fi](mailto:sini.isokaanta@uef.fi))

S1 Experimental conditions

Table S1 shows the experimental conditions for the experiment presented in this study. Figure S1 shows the evolution of the  $\alpha$ -pinene signal during the photooxidation.

10 Table S1: Experimental conditions for the experiment presented in this study.

| VOC-to-NOx<br>(ppbC/ppb) | NO (ppb) | NO2 (ppb) | OH exposure<br>(#/cm <sup>3</sup> s) |
|--------------------------|----------|-----------|--------------------------------------|
| 7.4                      | 22.5     | 58.3      | 2.34*10 <sup>11</sup>                |

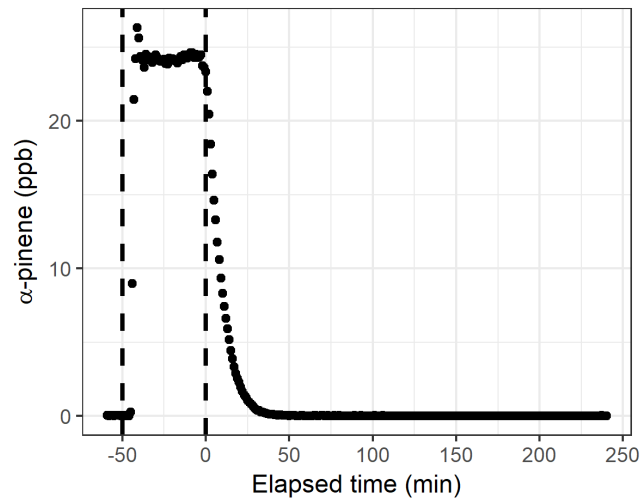

Figure S1 Evolution of the  $\alpha$ -pinene signal during the photooxidation.

S2 PMF details

S2.1 Minimum error for PTR data

Minimum error was determined by fitting a line for the last 1h of the experiment (see Fig. S2). During that time, only minor changes took place and the variation in the ion concentration was small. Therefore, this variation can be assumed to mostly consist of the noise in the data. The difference between the line fit and original signal (residuals) were calculated for each ion, and the standard deviation values were calculated from the residuals (see Fig. S3). Minimum error was selected as the median of those standard deviations. The minimum error was used to replace all values in the error matrix that were smaller than the minimum error. Figure S4 shows examples of the static error (a) and signal following error (b) described in the manuscript for the PTR data.

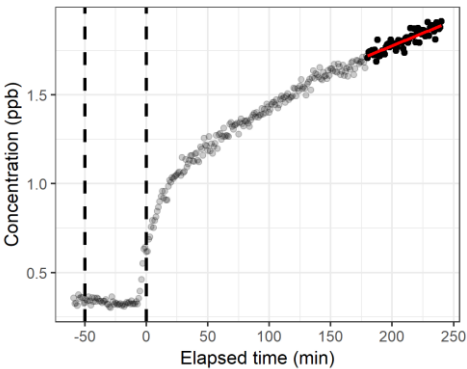

Figure S2 Example of the line fit ( $m/z$  73.07,  $C_4H_8O + H^+$ ). Dark points indicate the 1-hour period for which the linear fit (red) was applied.

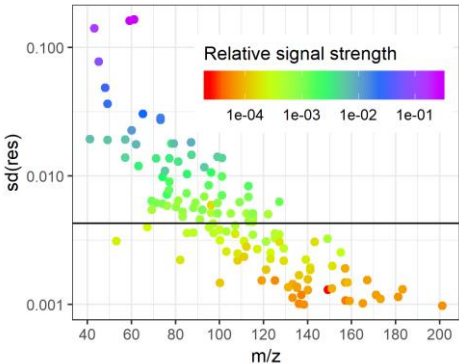

Figure S3 Standard deviations of the calculated residuals. Black horizontal line indicates the median value (0.0043) that is used as minimum error.

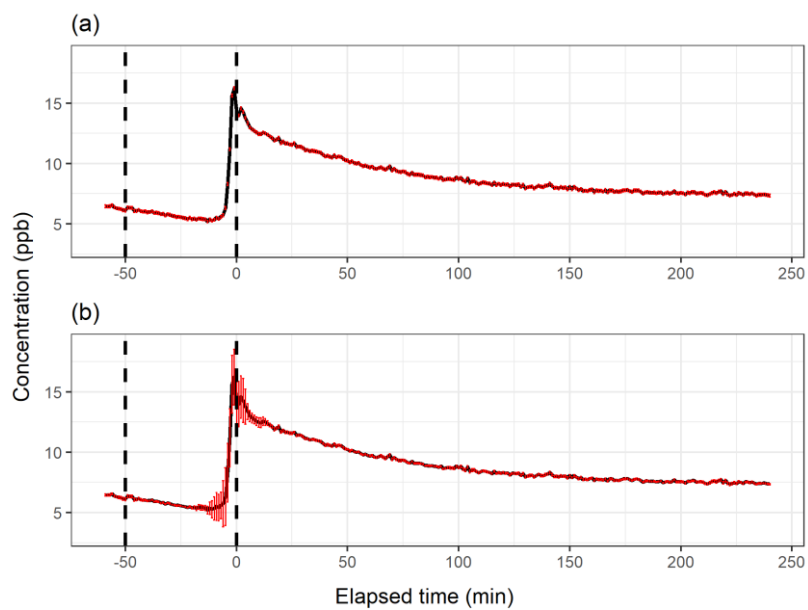

**Figure S4** PMF error schemes for  $\text{C}_2\text{H}_4\text{O}+\text{H}^+$  signal ( $m/z$  45.03) from PTR data. Static error in (a) and signal following error in (b).

## S2.2 Minimum error for AMS data

- 5 Due to the small number of data points and slower reactions in the particle phase, the determination of the minimum error from the later parts of the experiment was not possible. Here, the minimum error was calculated as for the PTR data, but the line fit was applied to the data before the photooxidation started (approximately 100 minutes). Before that time, no large changes in the particle mass concentration were observed, and the data mostly consisted on noise. Example of the line fit is shown in Fig. S4 and the standard deviations are shown in Fig. S4. Figure S7 shows an example of the static error (a) and
- 10 Poisson type error for AMS data.

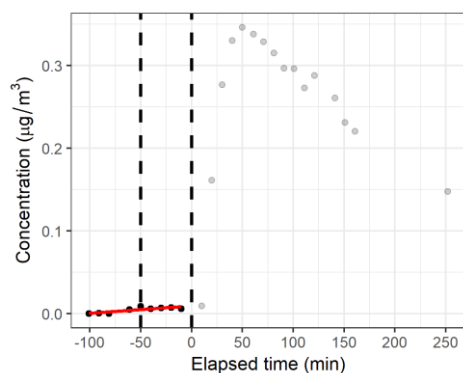

**Figure S5** Example of the line fit ( $m/z$  43.0548). Dark points indicate the first 100 minutes before the start of the photooxidation for which the linear fit (red) was applied.

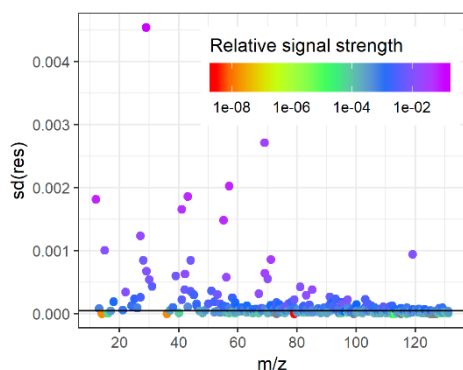

**Figure S6** Standard deviations of the calculated residuals. Black horizontal line indicates the median value ( $4.584 \cdot 10^{-5}$ ) that is used as a minimum error.

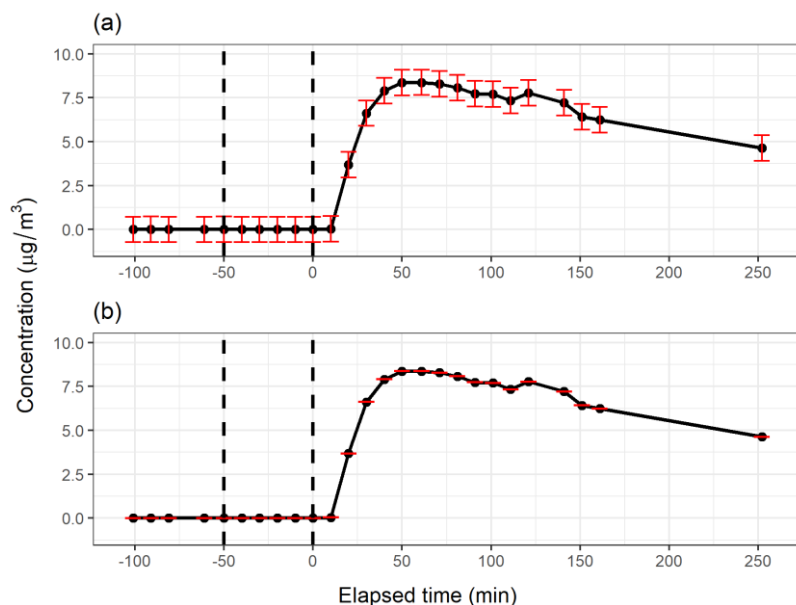

**Figure S4** PMF error schemes for  $m/z$  43.9898 from AMS data. Static error in (a) and Poisson type error in (b).

### S2.3 Signal-to-noise ratios (SNR)

Signal-to-noise ratios were calculated in the Igor PMF toolkit (Ulbrich et al., 2009) for the data sets with different error schemes. SNR classifies ions either as “weak” ( $0.2 < \text{SNR} < 2$ ) or “bad” ( $\text{SNR} < 0.2$ ). For PTR data with the static error, 12 ions out of 133 (9.0 %) were classified as weak and no bad variables ( $\text{SNR} < 0.2$ ) were present. For the signal dependent error, 9 ions (6.8 %) were classified as weak. For AMS data with the static error, 8 ions out of 306 (2.6 %) were classified as weak, and 1 ion (0.3 %) as bad. For the Poisson type error, 12 ions (3.9 %) were classified as weak, and 3 (0.98 %) as bad.

However, no removal or downweighting of the variables was applied, as for the weak ions the error values were already in the range of the ion signal itself, and for the bad variables the error was usually way above the signal throughout the ion time series. In addition, the number of weak or bad ions for both AMS and PTR data were rather small.

**S3 Multivariate normality of the used data**

5 Multivariate normality (MVN) of the PTR data was investigated with different tests presented detail in (Korkmaz et al., 2014). As a graphical approach, Fig. S7 shows the Chi-Square Quantile as a function of Mahalobnis distance (Q-Q plot). The points mainly follow the 1-1 reference line, but possible outliers are seen in the upper right corner. The other tests (Mardia’s MVN test, Henze-Zirkler’s test and Royston’s MVN test) did not indicate multivariate normality. However, outlier values might have significant effect here and distort the test results (Korkmaz et al., 2014). For AMS data, the multivariate  
10 normality could not be stated due to the singularity issues in the calculation caused by the small data size (less rows than columns). When inspecting the univariate normality (Shapiro Wilk’s tests) of the ions, none was declared as normally distributed.

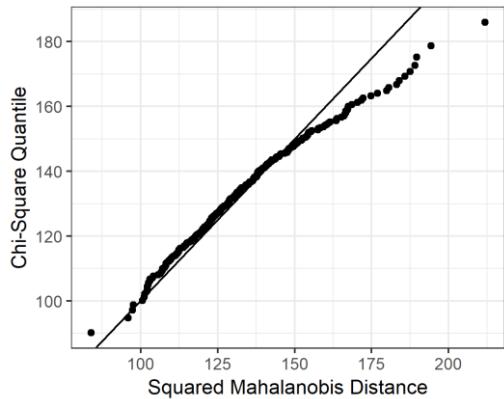

**Figure S5 Chi-square quantile as a function of squared Mahalobnis distance for the measured PTR data.**

15 **S4 Additional SDRT results for PTR data**

**S4.1 EFA, PCA and PAM**

Figure S9 shows the 5-factor results from ml-EFA with Oblimin rotation and Fig. S10 shows the original loadings values from ml-EFA with Oblimin rotation as a scatter plots for the 4-factor solution presented in the manuscript. Figure S11 shows the explained variance for the number of components from SVD-PCA and the unrotated component time series and original  
20 loadings (scaled eigenvalues) are shown in Fig. S12 with 4 components. Figure S13 and S14 shows results from PAM with 3 and 5 clusters, respectively. Table S2 presents the cluster sizes (number of compounds), maximum and average dissimilarities between the cluster compounds and the medoids, diameter of the cluster (maximum dissimilarity between two

observations in a cluster) and the separation of the cluster (minimum dissimilarity between compounds in different clusters) for the 4-cluster solution presented in the manuscript. Table S2 shows the clustering statistics.

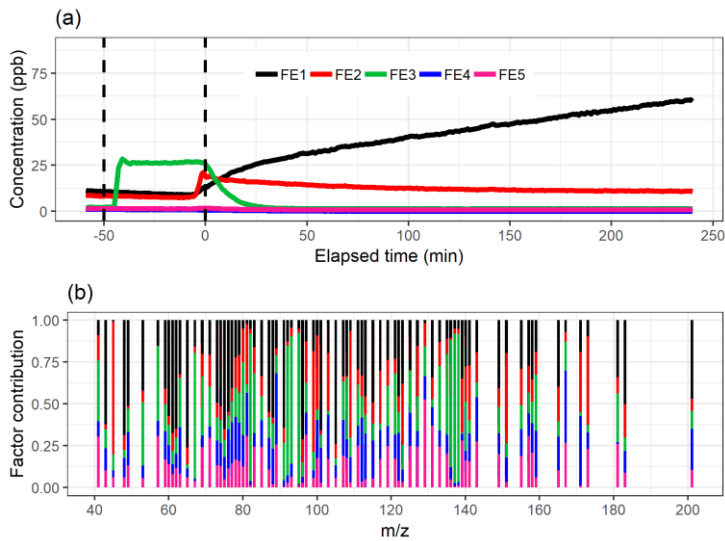

**Figure S6** The factor time series (a) and total factor contribution (b) from ml-EFA with Oblimin rotation for the 5-factor solution. The colour code identifying factors is the same in both panels.

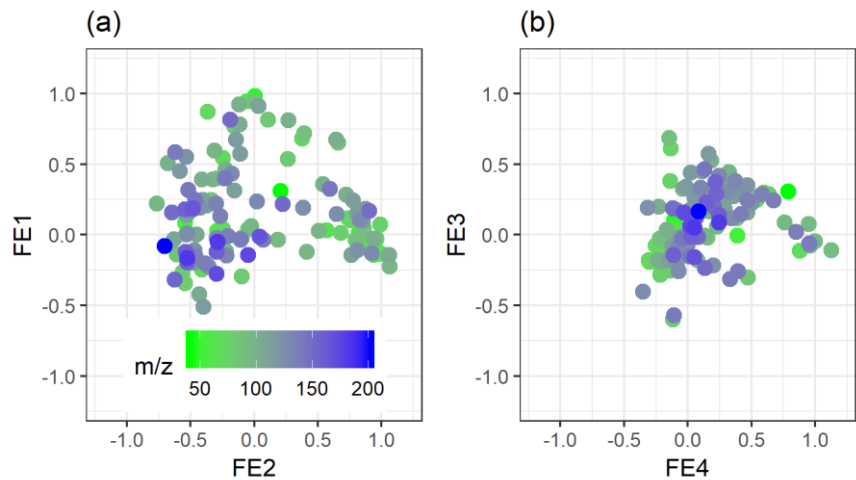

**Figure S10** Unscaled factor loadings (4-factor solution) for the factors from ml-EFA with Oblimin rotation. The colour code is the same on both panels.

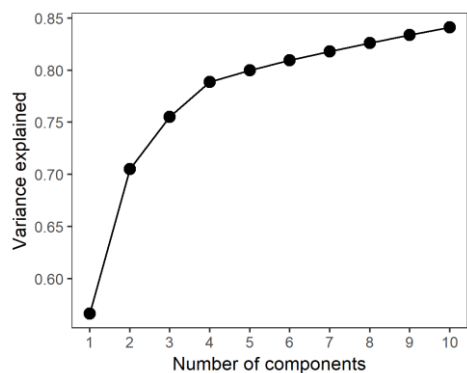

**Figure S11** Explained variance as a function of number of components from SVD-PCA for the PTR data.

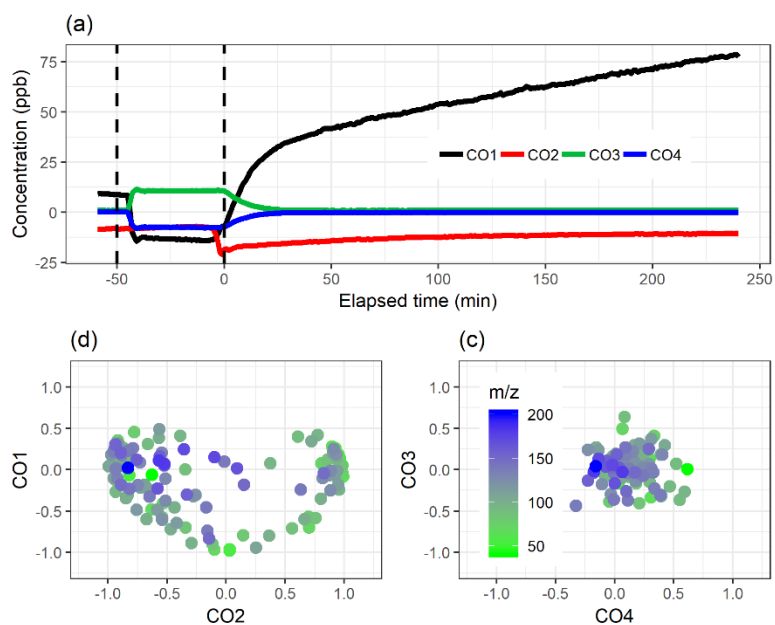

**5 Figure S12** Unrotated component time series (a) and original loadings (b-c, scaled eigenvalues) from SVD-PCA with 4 components. The colour code in (b) and (c) is the same.

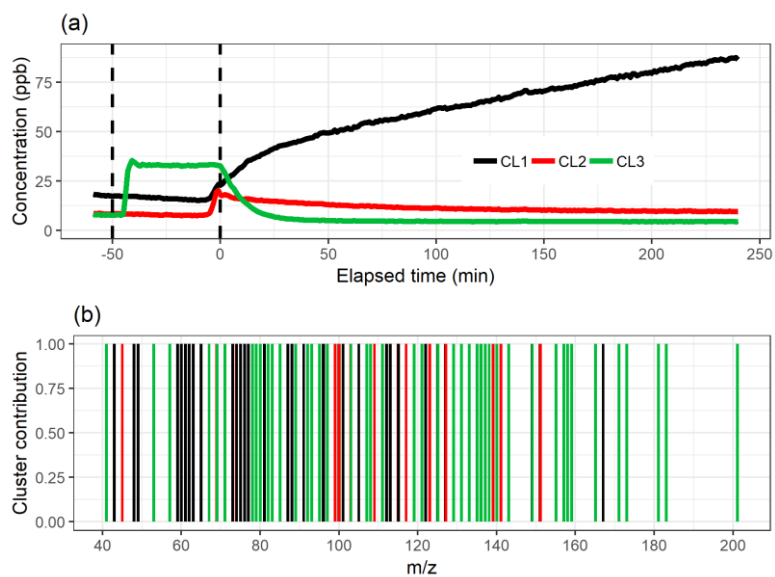

**Figure S13** Cluster time series (a) and contribution of ion to cluster (b) from PAM with 3 clusters. The colour code identifying clusters is the same in both panels.

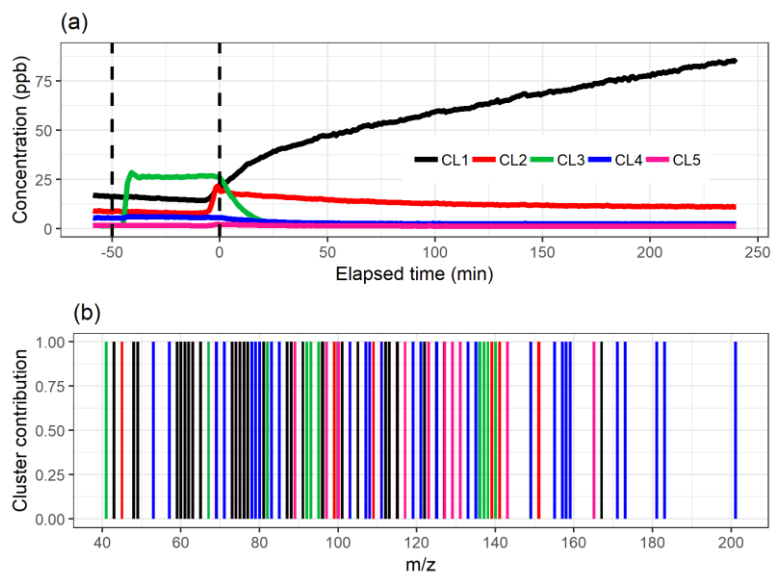

**Figure S14** Cluster time series (a) and contribution of ion to cluster (b) from PAM for with 5 clusters. The colour code identifying clusters is the same in both panels.



Table S2 Clustering results for the measurement data with 4 clusters.

| Cluster | Size | Maximum<br>dissimilarity | Average<br>Dissimilarity | Diameter | Separation | Medoid (m/z)                                                              |
|---------|------|--------------------------|--------------------------|----------|------------|---------------------------------------------------------------------------|
| 1       | 42   | 23.290                   | 7.107                    | 24.548   | 5.124      | 49.06 (C <sub>2</sub> H <sub>8</sub> O+H <sup>+</sup> )                   |
| 2       | 23   | 22.105                   | 12.663                   | 25.524   | 5.124      | 45.03 (C <sub>2</sub> H <sub>4</sub> O+H <sup>+</sup> , acetaldehyde)     |
| 3       | 14   | 22.288                   | 5.587                    | 24.188   | 5.307      | 137.13 (C <sub>10</sub> H <sub>16</sub> +H <sup>+</sup> , α-pinene)       |
| 4       | 54   | 23.121                   | 11.284                   | 24.890   | 5.307      | 107.09 (C <sub>8</sub> H <sub>10</sub> +H <sup>+</sup> , dimethylbenzene) |

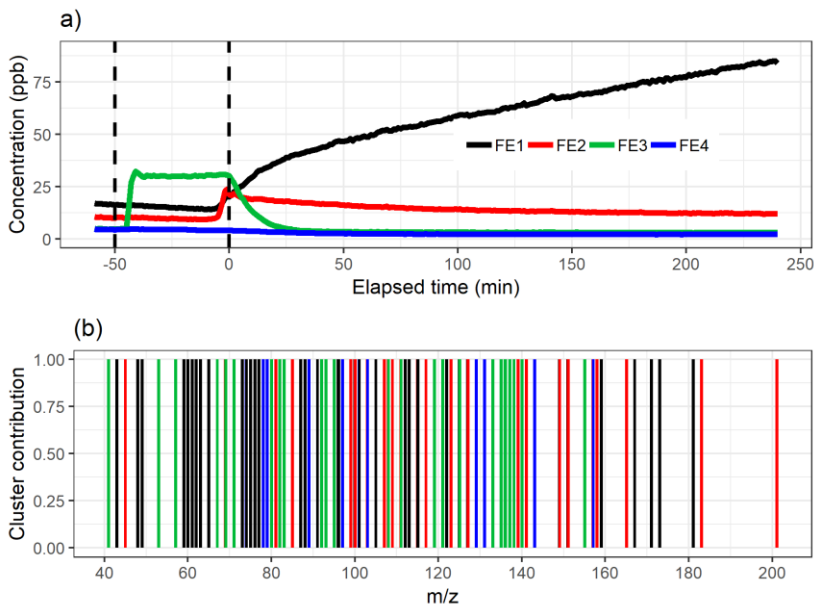

Figure S15 Factor time series (a) and contribution of ion to factor (b) from dichotomized EFA (Oblimin rotated) with 4 factors. The colour code identifying clusters is the same in both panels.

S4.2 NMF and PMF

Figure S16 shows the NMF results with only 4 factors. Figure S17 shows a boxplot of the distribution of the residuals for NMF with 4- and 5-factor solutions. Figure S18 shows the PMF results with factorization rank 4 for the different error schemes.

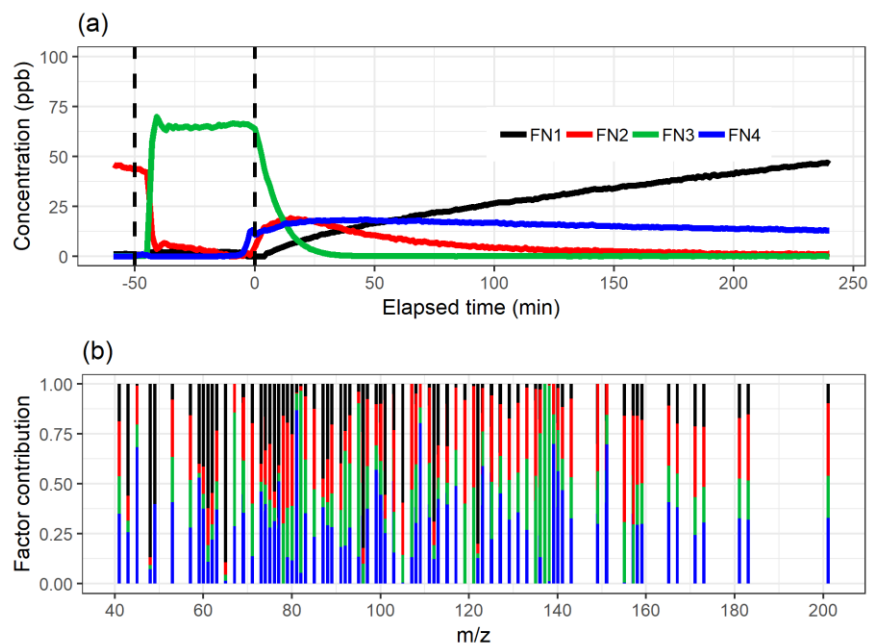

**Figure S16** Factor time series (a) and contribution of ion to factor (b) from NMF with 4 factors. The colour code identifying clusters is the same in both panels.

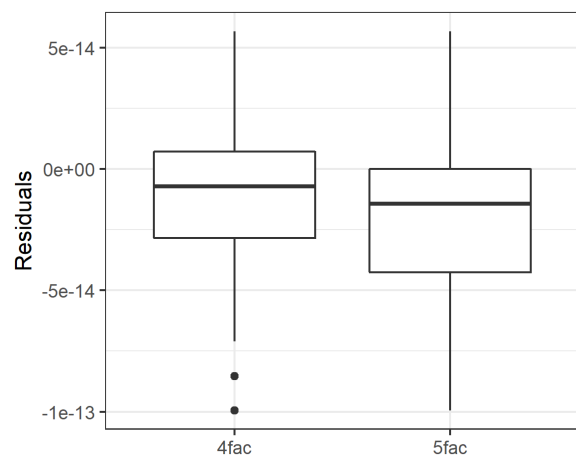

**Figure S17** Boxplot of the residuals (original total signal – reconstructed total signal) with 4 and 5 factors from NMF.

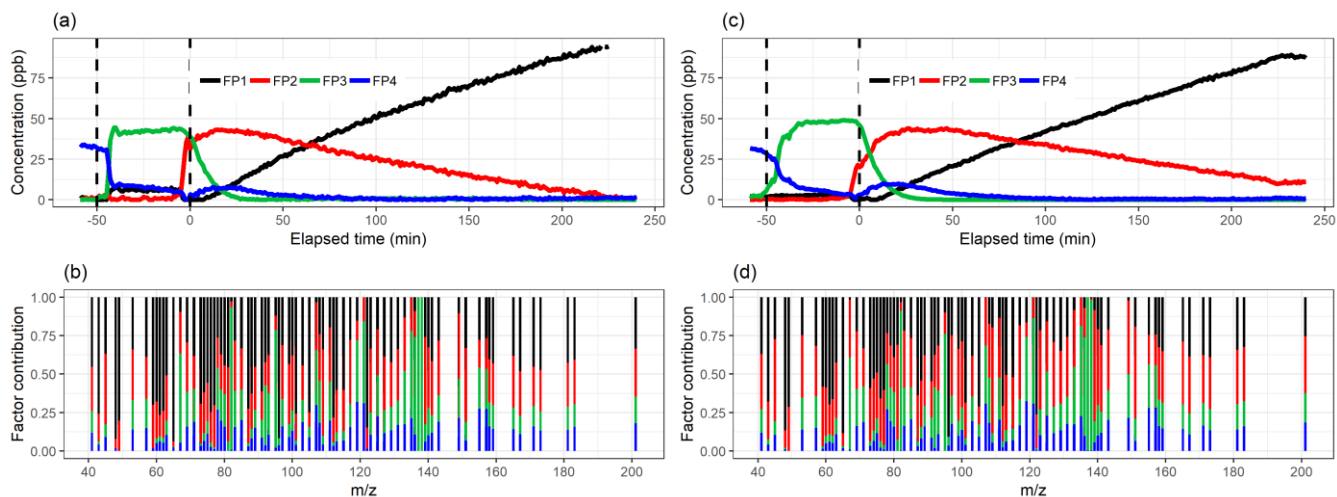

**Figure S18** Factor time series and contribution from PMF (fpeak = 0) with static error (a-b) and signal following error (c-d) for factorization rank 4. The colour code identifying the factors is the same in the top and bottom panels.

## S5 Contrast angle

- 5 The contrast angle describes how close two vector are in  $n$ -dimensional space. Here,  $n$  is the number of variables (ions) in the data. The contrast angle  $\theta$  between two vectors can be calculated from

$$\cos(\theta) = \frac{(\vec{u} \cdot \vec{v})}{(|\vec{u}| \cdot |\vec{v}|)}, \quad (\text{S1})$$

- where  $u$  and  $v$  are the two vectors to be compared. The distribution of ions (see e.g. Fig. 3b) into the different factors between different SDRTs can be then compared by calculating the contrast angle between the same factor acquired with different methods (i.e. between factor1 from EFA and NMF, Figs. 3b and 6b). The larger the contrast angle is ( $\theta = [0, 90]$ ), the farther apart the factors are from each other (i.e. more different) in the  $n$ -dimensional space. The contrast angles between the SDRTs, excluding PAM, for the PTR data are shown in Table S3.

- The contrast angles between EFA and PCA are very small, indicating the distribution of ions between the factors in these methods is indeed similar, as also noted in the manuscript. Differences between the different error schemes for PMF are also rather small, however, for factor2 the difference is slightly larger. The differences are obviously larger when the methods had different number of factors (4 factors were selected for PCA and EFA, and 5 factors for PMF and NMF).

- Table S4 shows the contrast angles for AMS data between NMF and PMF with static error scheme. PMF with Poisson style error is omitted due to the inability to interpret the factors reasonably. For the AMS data the factors were rather different when inspecting the factor time series. However, the distribution of ions seemed to agree decently. From Table S4 we may note, that between factors 2-4 the contrast angle is indeed small, indicating good agreement between the SDRTs. However, for the factor1 (interpreted as primary OA, HOA) the contrast angle is larger, indicating a larger number of ions have

different contribution to factor1 between NMF and PMF. Indeed, when we inspect the larger m/z in Figs. 12b and 13b, PMF has more contribution of ions with larger m/z compared to NMF.

**Table S3 Contrast angles for the factors from SDRTs applied to the measured PTR data. PMF1 refers to PMF with static error scheme, and PMF2 for the signal following error.**

| factor       | 1    | 2    | 3    | 4    | 5    | SDRT-pair |
|--------------|------|------|------|------|------|-----------|
| $\theta$ (°) | 3.0  | 13.0 | 6.7  | 1.5  | 2.8  | PMF1/PMF2 |
|              | 16.7 | 13.8 | 3.8  | 4.5  | 20.8 | PMF1/NMF  |
|              | 19.0 | 20.6 | 8.6  | 3.7  | 19.4 | PMF2/NMF  |
|              | 30.5 | 31.7 | 23.4 | 35.0 | NA   | EFA/NMF   |
|              | 30.6 | 31.9 | 24.4 | 35.4 | NA   | PCA/NMF   |
|              | 23.8 | 33.5 | 25.6 | 36.6 | NA   | PMF1/EFA  |
|              | 23.6 | 35.3 | 27.8 | 36.1 | NA   | PMF2/EFA  |
|              | 24.1 | 33.7 | 26.7 | 37.1 | NA   | PMF1/PCA  |
|              | 23.9 | 35.5 | 29.2 | 36.5 | NA   | PMF2/PCA  |
|              | 1.9  | 1.9  | 3.5  | 3.1  | NA   | PCA/EFA   |

**Table S4 Contrast angles for the factors from PMF and NMF applied to the measured AMS data. PMF1 refers to PMF with static error scheme.**

| factor       | 1    | 2   | 3   | 4   | SDRT-pair |
|--------------|------|-----|-----|-----|-----------|
| $\theta$ (°) | 51.0 | 4.5 | 2.6 | 6.2 | PMF1/NMF  |

### S6 Additional SDRT results for AMS data

#### S6.1 EFA, PCA and PAM

Figure S19 shows the test results for the different number of factors, components and clusters for EFA, PCA and PAM, respectively. Figures S20 and S21 show pa-EFA results for the AMS data with 2 and 3 factors. More factors were also tested, but only the 2 factors can be separated. PCA (ECD and SVD) had similar behaviour. In addition, the loading value distribution between the first two factors in Fig. S20b barely changes when adding a new factor (Fig. S21b), indicating the algorithm is not able to separate any additional factors from the first 2. Figures S22 and S23 show the results from PAM with 2-5 clusters.

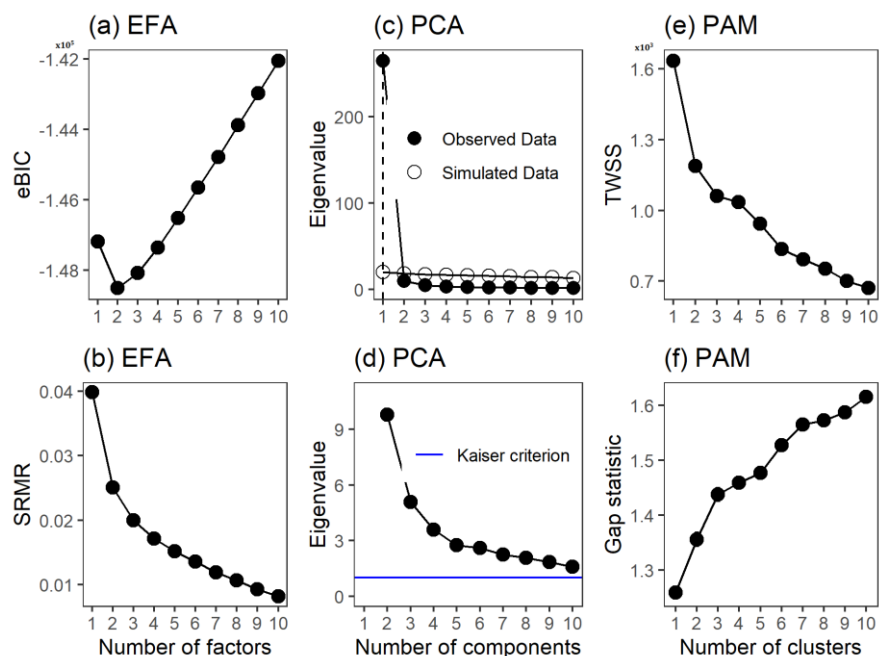

**Figure S19** Empirical BIC (a) and SRMR (b) as a function of the number of factors for pa-EFA, Parallel analysis (c) and Kaiser criterion (d) for EVD-PCA and TWSS (e) and Gap statistic (f) for PAM. Data measured with AMS.

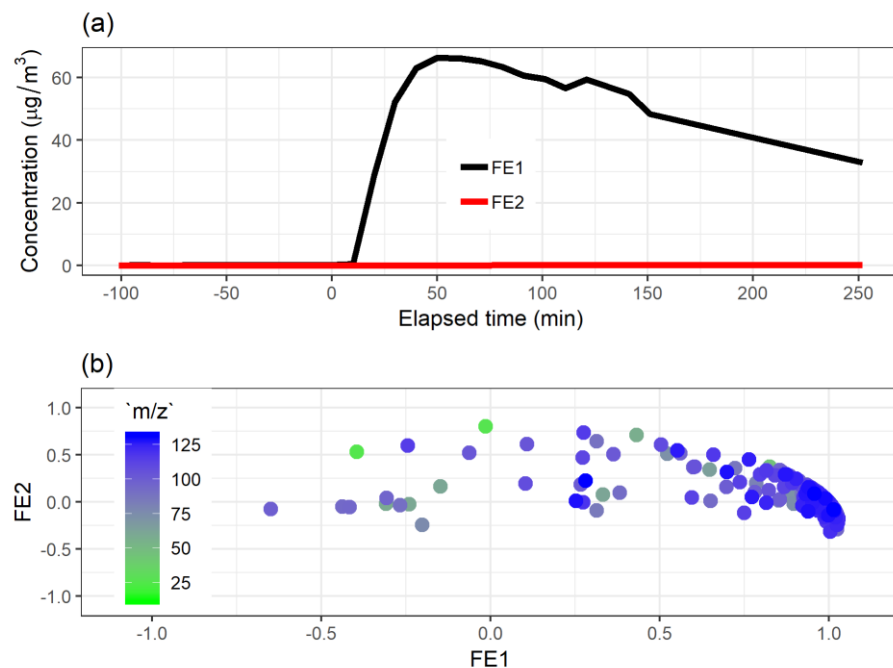

**5 Figure S20** Oblimin rotated factor time series (a) and original loadings (b) from pa-EFA with 2 factors for the data measured with AMS.

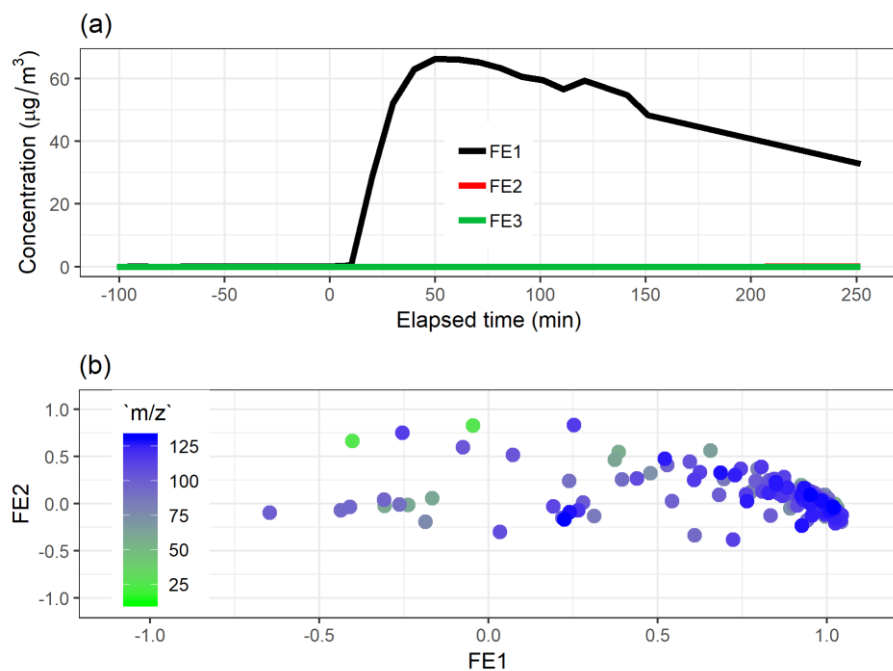

**Figure S21** Oblimin rotated factor time series (a) and original loadings (b) from pa-EFA with 3 factors for the data measured with AMS.

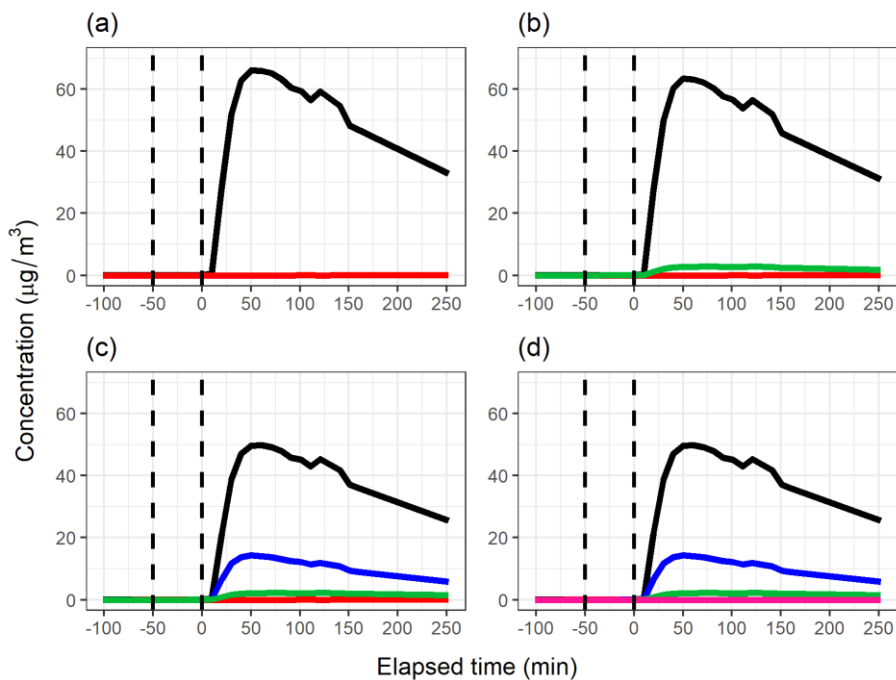

**5 Figure S22** Cluster time series from PAM with (a) 2, (b) 3, (c) 4 and (d) 5 clusters for the measured AMS data.

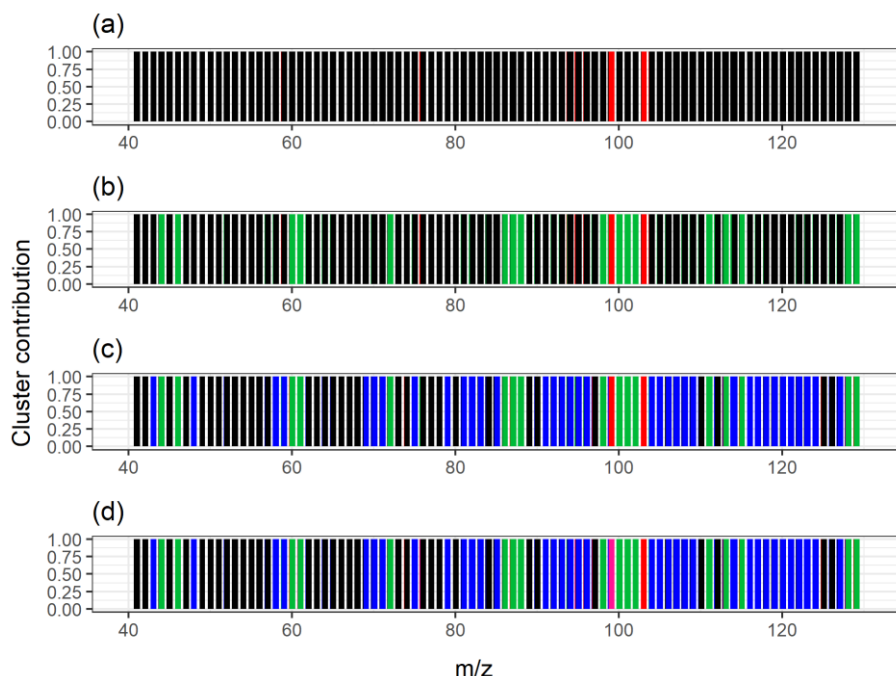

**Figure S23** Cluster contribution from PAM with (a) 2, (b) 3, (c) 4 and (d) 5 clusters for the measured AMS data. The colours in the subplots correspond to the time series in Fig. S22. Ions with  $m/z > 40$  are omitted from the plot as no changes were observed (ions were in black factor in all cases).

## 5 S6.2 NMF and PMF

To further justify the selected number of factors in NMF for AMS data, we compared the results from the 3-, 4- and 5-factor solutions. In the 3-factor solution (Fig. S23), FN1 appeared before  $t = 0$  min indicating it includes mostly primary OA. However, this factor decreased to 0 at the start of photooxidation, but then increased again around  $t = 80$  min. In the 4-factor case, the corresponding factor exhibits a small increase at  $t = 0$  min and stays rather constant after that. In addition, with 3 factors the LVOOA factor (FN3 in the 4-factor case) is not observed at all, indicating 3 factors is not enough to separate LVOOA from the primary HOA. The decision between 4-factor and 5-factor (Fig. S24) solutions is more difficult. FN3 is the same in both cases. FN1 which must be identified as containing “primary” OA from the car emissions as it captures the signal at  $t < 0$  min, shows opposite behaviour at the onset of photooxidation. In the 4-factor solution it increases, but in the 5-factor solution it drops to 0 in less than 10 min. This seems to be unlikely behaviour, as no such sudden loss process is expected in the particle phase. The main reason for decreasing signals in the AMS is the overall particle wall loss, which will affect all compounds equally as long as there is no strong particle size dependence of the particle composition. Other reasons for individual compounds decreasing are evaporation of semi volatile compounds if their concentration in the gas phase changes or particle phase chemistry. Although these processes may be started by the onset of photochemistry in the gas phase, neither of them is expected to be that fast. The other main impact of the additional factor is a redistribution of the signal in FN2 and FN4 (4-factor solution) to factors FN2, FN4 and FN5 (5-factor solution). The stable concentration

value of FN5 after the initial fast increase can only be explained by a constant source for these compounds large enough to compensate the overall particle loss to the chamber walls. Again, this seems rather unlikely for experiment conditions. Overall, the 4-factor solution has the most interpretable results and the statistical tests suggest it as a good solution. Figures S26 and S27 show the PMF results with 3 and 5 factors, respectively.

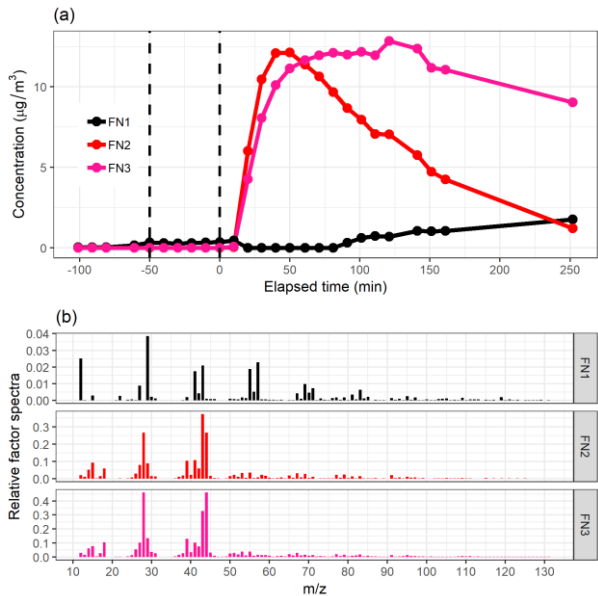

**Figure S24** Factor time series (a) and relative factor spectra (b) from NMF with 3 factors for the measured AMS data. The colour code identifying the factors is the same in both panels.

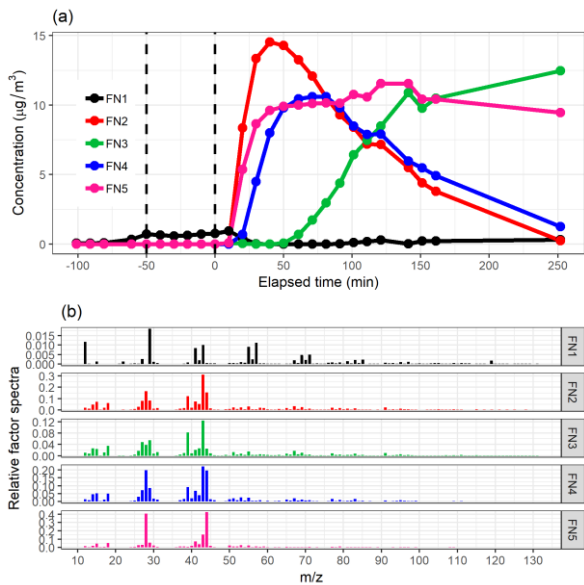

**Figure S25** Factor time series (a) and relative factor spectra (b) from NMF with 5 factors for the measured AMS data. The colour code identifying the factors is the same in both panels.



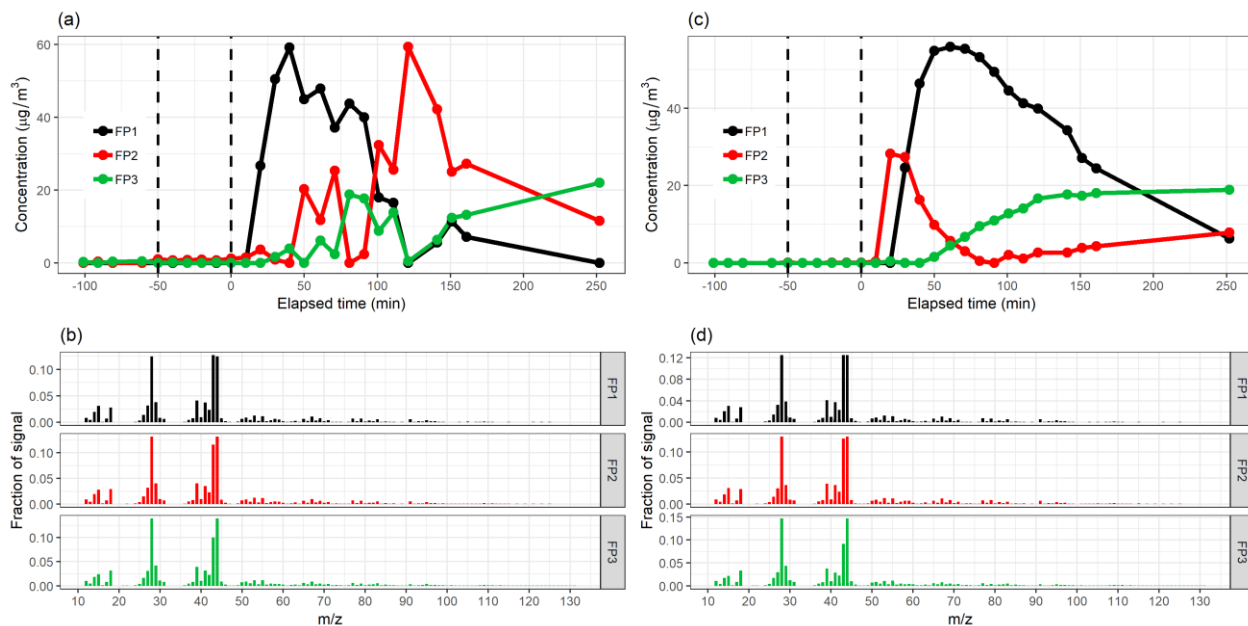

**Figure S26** Factor time series and contribution from PMF with static error (a-b) and Poisson style error (c-d) for factorization rank 3 for the measured AMS data.

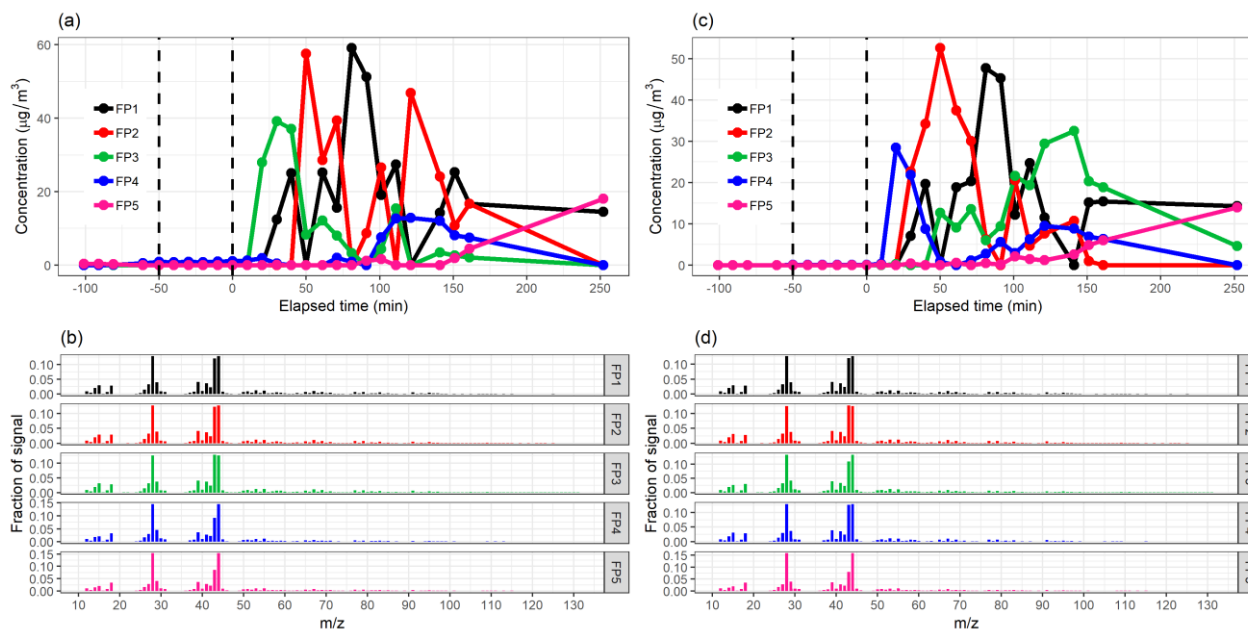

**Figure S27** Factor time series and contribution from PMF with static error (a-b) and Poisson style error (c-d) for factorization rank 5 for the measured AMS data.

## S7 References

- Korkmaz, S., Goksuluk, D., and Zararsiz, G.: MVN: An R Package for Assessing Multivariate Normality, *R J*, 6, 151-162, 2014.
- 5 Ulbrich, I. M., Canagaratna, M. R., Zhang, Q., Worsnop, D. R., and Jimenez, J. L.: Interpretation of organic components from Positive Matrix Factorization of aerosol mass spectrometric data, *Atmos Chem Phys*, 9, 2891-2918, 10.5194/acp-9-2891-2009, 2009.
